# Supplementary material for: Descriptive Analysis of Gastric Cancer Mortality in Korea, 2000–2020
Source: PubMed Central journal article supplement — Cancer Res Treat. 2022 Sep 6;55(2):603–17. doi: 10.4143/crt.2022.307 (PMC10101797; doi:10.4143/crt.2022.307), 2022-09-06
Supplement: crt-2022-307-S2-Table.pdf [file crt-2022-307-S2-Table.pdf]

**S2 Table.** Logarithm of rate ratios and 95% confidence intervals for effects of age, birth cohort, and period on gastric cancer mortality

| Effect | Value  | Log (rate ratio) (95% confidence interval) |                        |                        |
|--------|--------|--------------------------------------------|------------------------|------------------------|
|        |        | Both sexes                                 | Men                    | Women                  |
| Age    | 20     | -3.53 (-5.14 to -1.92)                     | -3.88 (-5.65 to -2.11) | -3.23 (-4.70 to -1.75) |
|        | 25     | -2.47 (-3.36 to -1.58)                     | -2.86 (-3.85 to -1.86) | -2.12 (-2.93 to -1.32) |
|        | 30     | -1.74 (-2.41 to -1.07)                     | -2.20 (-2.96 to -1.44) | -1.33 (-1.94 to -0.73) |
|        | 35     | -1.26 (-1.83 to -0.69)                     | -1.62 (-2.25 to -1.00) | -0.88 (-1.41 to -0.35) |
|        | 40     | -0.84 (-1.35 to -0.34)                     | -1.08 (-1.61 to -0.54) | -0.56 (-1.06 to -0.07) |
|        | 45     | -0.43 (-0.87 to 0)                         | -0.55 (-0.99 to -0.10) | -0.29 (-0.75 to 0.16)  |
|        | 50     | 0 (-0.36 to 0.37)                          | 0 (-0.36 to 0.36)      | -0.05 (-0.46 to 0.35)  |
|        | 55     | 0.37 (0.07 to 0.66)                        | 0.45 (0.17 to 0.74)    | 0.13 (-0.23 to 0.48)   |
|        | 60     | 0.69 (0.45 to 0.92)                        | 0.83 (0.61 to 1.04)    | 0.35 (0.05 to 0.64)    |
|        | 65     | 0.97 (0.79 to 1.16)                        | 1.17 (0.99 to 1.34)    | 0.60 (0.37 to 0.83)    |
|        | 70     | 1.30 (1.13 to 1.48)                        | 1.55 (1.38 to 1.73)    | 0.97 (0.78 to 1.17)    |
|        | 75     | 1.74 (1.53 to 1.95)                        | 2.03 (1.81 to 2.25)    | 1.52 (1.32 to 1.73)    |
|        | 80     | 2.29 (2.02 to 2.55)                        | 2.66 (2.37 to 2.96)    | 2.14 (1.88 to 2.39)    |
|        | 85     | 2.92 (2.58 to 3.26)                        | 3.49 (3.11 to 3.86)    | 2.77 (2.45 to 3.10)    |
|        | Cohort | 1915                                       | 2.02 (1.57 to 2.46)    | 2.33 (1.87 to 2.78)    |
| 1920   |        | 1.91 (1.54 to 2.29)                        | 2.17 (1.80 to 2.55)    | 1.72 (1.33 to 2.10)    |
| 1925   |        | 1.72 (1.39 to 2.04)                        | 1.96 (1.63 to 2.28)    | 1.58 (1.24 to 1.92)    |
| 1930   |        | 1.39 (1.09 to 1.69)                        | 1.61 (1.32 to 1.90)    | 1.28 (0.96 to 1.60)    |
| 1935   |        | 0.94 (0.63 to 1.24)                        | 1.04 (0.76 to 1.33)    | 0.83 (0.5 to 1.15)     |
| 1940   |        | 0.48 (0.15 to 0.80)                        | 0.52 (0.21 to 0.84)    | 0.34 (-0.03 to 0.71)   |

|        |           |                        |                        |                        |
|--------|-----------|------------------------|------------------------|------------------------|
|        | 1945      | 0.22 (−0.16 to 0.59)   | 0.23 (−0.13 to 0.59)   | 0.08 (−0.34 to 0.50)   |
|        | 1950      | −0.10 (−0.53 to 0.34)  | −0.09 (−0.52 to 0.33)  | −0.29 (−0.77 to 0.20)  |
|        | 1955      | −0.49 (−0.99 to 0.01)  | −0.49 (−0.99 to 0.01)  | −0.63 (−1.17 to −0.09) |
|        | 1960      | −0.76 (−1.33 to −0.20) | −0.79 (−1.37 to −0.22) | −0.82 (−1.4 to −0.23)  |
|        | 1965      | −0.82 (−1.45 to −0.19) | −0.90 (−1.56 to −0.25) | −0.76 (−1.39 to −0.13) |
|        | 1970      | −0.92 (−1.61 to −0.23) | −1.08 (−1.82 to −0.34) | −0.75 (−1.42 to −0.09) |
|        | 1975      | −0.91 (−1.66 to −0.15) | −1.15 (−1.98 to −0.32) | −0.66 (−1.37 to 0.05)  |
|        | 1980      | −0.96 (−1.82 to −0.10) | −1.24 (−2.21 to −0.28) | −0.67 (−1.47 to 0.12)  |
|        | 1985      | −1.04 (−2.25 to 0.17)  | −1.19 (−2.50 to 0.13)  | −0.82 (−1.95 to 0.31)  |
|        | 1990      | −1.24 (−3.3 to 0.82)   | −1.54 (−3.88 to 0.81)  | −0.88 (−2.73 to 0.97)  |
|        | 1995      | −1.43 (−6.41 to 3.55)  | −1.39 (−6.23 to 3.45)  | −1.38 (−6.57 to 3.82)  |
| Period | 2000-2004 | 0.35 (0.21 to 0.48)    | 0.34 (0.20 to 0.48)    | 0.39 (0.25 to 0.53)    |
|        | 2005-2009 | 0.14 (0.07 to 0.21)    | 0.16 (0.09 to 0.22)    | 0.13 (0.05 to 0.21)    |
|        | 2010-2014 | −0.10 (−0.18 to −0.03) | −0.09 (−0.16 to −0.03) | −0.12 (−0.21 to −0.03) |
|        | 2015-2019 | −0.38 (−0.52 to −0.24) | −0.4 (−0.55 to −0.26)  | −0.39 (−0.54 to −0.25) |

---
