# Supplementary material for: Descriptive Analysis of Gastric Cancer Mortality in Korea, 2000–2020
Source: PubMed Central journal article supplement — Cancer Res Treat. 2022 Sep 6;55(2):603–17. doi: 10.4143/crt.2022.307 (PMC10101797; doi:10.4143/crt.2022.307), 2022-09-06
Supplement: crt-2022-307-S8-Fig.pdf [file crt-2022-307-S8-Fig.pdf]

**Both sexes**

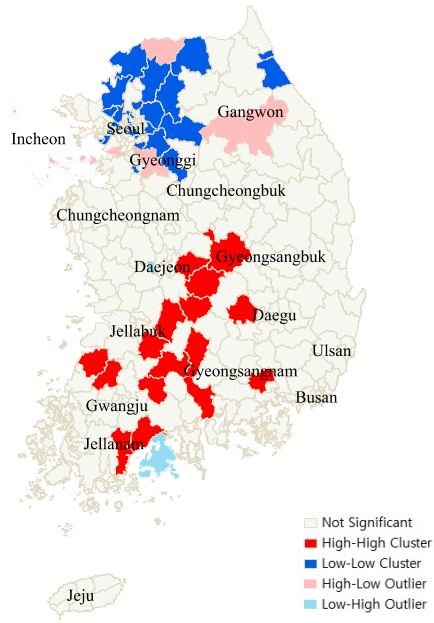

**Men**

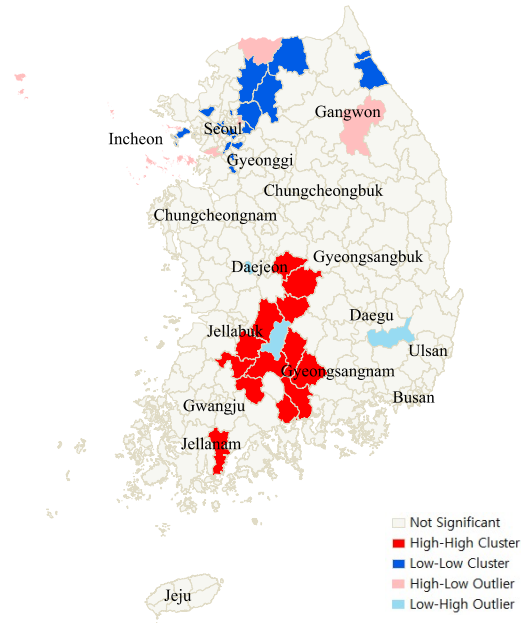

**Women**

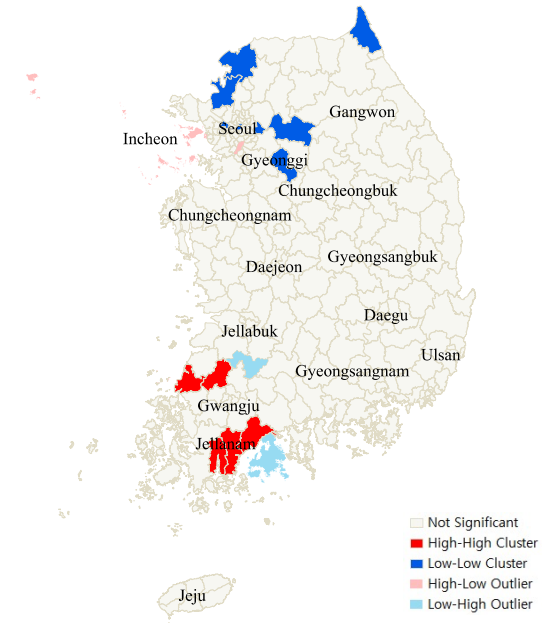

**S8 Fig.** Local Moran's I cluster maps for spatial association of age-standardized gastric cancer mortality rates in Korea, 2000.
