# Supplementary material for: Descriptive Analysis of Gastric Cancer Mortality in Korea, 2000–2020
Source: PubMed Central journal article supplement — Cancer Res Treat. 2022 Sep 6;55(2):603–17. doi: 10.4143/crt.2022.307 (PMC10101797; doi:10.4143/crt.2022.307), 2022-09-06
Supplement: crt-2022-307-S12-Fig.pdf [file crt-2022-307-S12-Fig.pdf]

### Korea

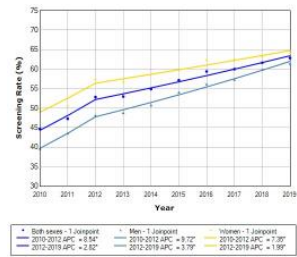

### Seoul

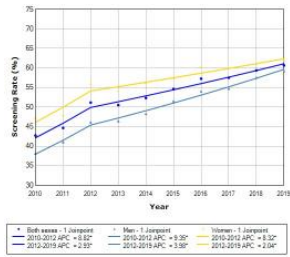

### Busan

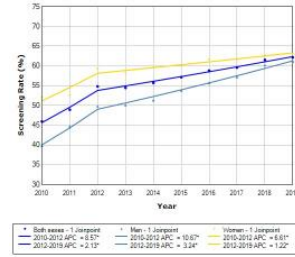

### Daegu

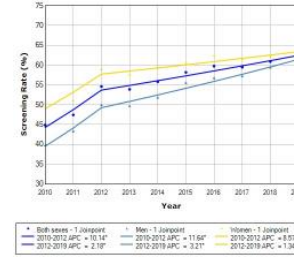

### Incheon

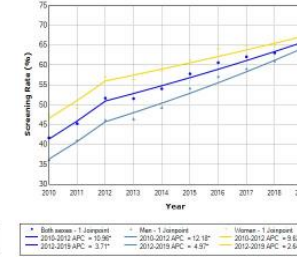

### Gwangju

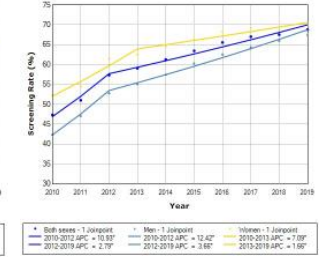

### Daejeon

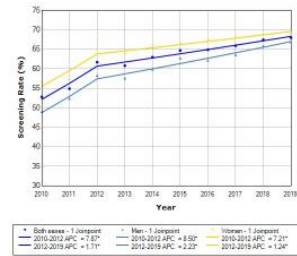

### Ulsan

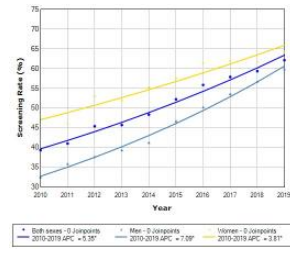

### Sejong

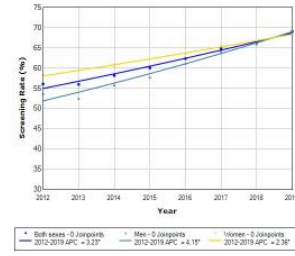

### Gyeonggi

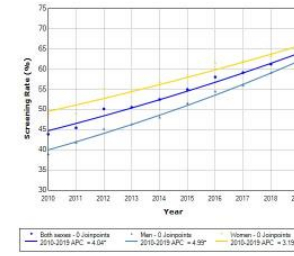

### Gangwon

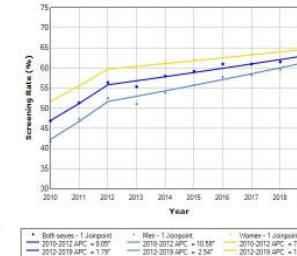

### Chungcheongbuk

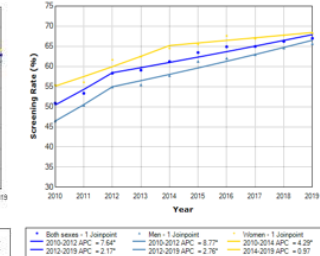

### Chungcheongnam

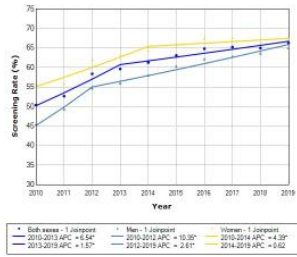

### Jeollabuk

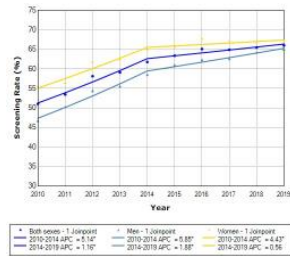

### Jeollanam

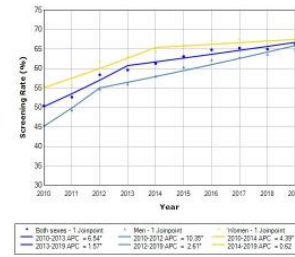

### Gyeongsangbuk

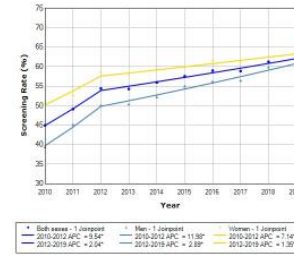

### Gyeongsangnam

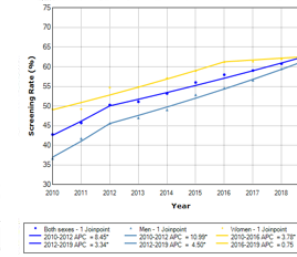

### Jeju

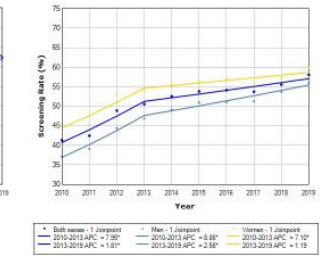

**S12 Fig.** Trends of gastric cancer screening rates in Korea between 2010 and 2019.
