# Supplementary material for: Descriptive Analysis of Gastric Cancer Mortality in Korea, 2000–2020
Source: PubMed Central journal article supplement — Cancer Res Treat. 2022 Sep 6;55(2):603–17. doi: 10.4143/crt.2022.307 (PMC10101797; doi:10.4143/crt.2022.307), 2022-09-06
Supplement: crt-2022-307-S13-Table.pdf [file crt-2022-307-S13-Table.pdf]

**S13 Table.** Characteristics of gastric cancer patients by cancer centers from 2008 to 2020

| City/<br>province | Center                                              | No.<br>patient<br>s | Cyto-<br>patholog<br>y | Surgical<br>pathology |              | Surgery          |       |             |       | Treatment                                   |              |
|-------------------|-----------------------------------------------------|---------------------|------------------------|-----------------------|--------------|------------------|-------|-------------|-------|---------------------------------------------|--------------|
|                   |                                                     |                     |                        | Early                 | Advance<br>d | Laparoscop<br>ic | Open  | Roboti<br>c | Other | Chemotherap<br>y and<br>targeted<br>therapy | Radiotherapy |
| Seoul             | Bundang Seoul<br>National<br>University<br>Hospital | 13,766              | 2,521                  | 7,818                 | 3,229        | 7,674            | -     | 1,395       | -     | 30,640                                      | 11,921       |
|                   | Yonsei Cancer<br>Center                             | 24,079              | 9,580                  | 8,094                 | 3,715        | 5,051            | 2,291 | 5,884       | -     | 60,821                                      | 1,812        |
| Gyeongg<br>i-do   | National Cancer<br>Center                           | 9,093               | 1,599                  | 1,716                 | 3,098        | 2,329            | 177   | 1,681       | -     | 67,408                                      | 513          |
|                   | Ajou University<br>LINC                             | 10,715              | 1,924                  | 2,317                 | 1,684        | 3,084            | 518   | 1,310       | -     | 24,397                                      | 597          |
| Daejeon           | Konyang<br>University<br>Hospital                   | 2,699               | 879                    | 679                   | 19           | 146              | 33    | 535         | 59    | 6,982                                       | 63           |
|                   | Daegu Catholic<br>University<br>Medical Center      | 4,151               | 3,566                  | 2,715                 | 1,930        | 487              | -     | 603         | 2,609 | -                                           | 153          |

|                  |                                                      |        |       |       |       |       |       |       |            |        |       |
|------------------|------------------------------------------------------|--------|-------|-------|-------|-------|-------|-------|------------|--------|-------|
| Incheon          | Gachon University<br>Gil Medical<br>Center           | 4,665  | 1,451 | 2,185 | 1,178 | 438   | -     | 356   | 56         | 11,446 | 215   |
| Jeollabu<br>k-do | Jeonbuk National<br>University<br>Hospital           | 7,205  | -     | -     | -     | 1,732 | 1,732 | 1,732 | -          | -      | 6,015 |
| Jeollana<br>m-do | Chonnam National<br>University<br>Hwasun<br>Hospital | 14,404 | 935   | 24    | -     | 904   | 2     | 310   | 10,54<br>7 | 49,958 | 928   |

---
