# Supplementary material for: Descriptive Analysis of Gastric Cancer Mortality in Korea, 2000–2020
Source: PubMed Central journal article supplement — Cancer Res Treat. 2022 Sep 6;55(2):603–17. doi: 10.4143/crt.2022.307 (PMC10101797; doi:10.4143/crt.2022.307), 2022-09-06
Supplement: crt-2022-307-S14-Table.pdf [file crt-2022-307-S14-Table.pdf]

**S14 Table.** Pearson correlation coefficients between age-standardized gastric cancer incidence and mortality in 250 administrative regions

| <b>Year</b> | <b>1999-2003</b> | <b>2004-2008</b> | <b>2009-2013</b> |
|-------------|------------------|------------------|------------------|
| 2003        | 0.67             |                  |                  |
| 2004        | 0.45             |                  |                  |
| 2005        | 0.51             |                  |                  |
| 2006        | 0.41             |                  |                  |
| 2007        | 0.42             |                  |                  |
| 2008        | 0.30             | 0.48             |                  |
| 2009        | 0.29             | 0.38             |                  |
| 2010        | 0.35             | 0.41             |                  |
| 2011        | 0.31             | 0.32             |                  |
| 2012        | 0.39             | 0.34             |                  |
| 2013        | 0.33             | 0.29             | 0.35             |
| 2014        | 0.37             | 0.30             | 0.33             |
| 2015        | 0.25             | 0.21             | 0.39             |
| 2016        | 0.28             | 0.22             | 0.25             |
| 2017        | 0.36             | 0.33             | 0.34             |
| 2018        | 0.20             | 0.25             | 0.32             |
| 2019        | 0.27             | 0.19             | 0.12             |
| 2020        | 0.18             | 0.25             | 0.26             |
